# Supplementary material for: Magnetic Resonance Imaging: Time-Dependent Wetting and Swelling Behavior of an Auxetic Hydrogel Based on Natural Polymers
Source: MDPI journal article supplement (doi:10.3390/polym14225023), 2022-11-19
Supplement: s1 [file s1]

# Supplementary Material

Sandra Haas<sup>1</sup>, Barbara Schmiegl<sup>1,2</sup>, Paul Wendling<sup>1</sup>, Gisela Guthausen<sup>3,4</sup>, Jürgen Hubbuch<sup>1,2\*</sup>

<sup>1</sup> Institute of Process Engineering in Life Sciences, Section IV: Molecular Separation Engineering, Karlsruhe Institute of Technology (KIT), Fritz-Haber-Weg 2, 76131 Karlsruhe, Germany

<sup>2</sup> Institute of Functional Interfaces, Karlsruhe Institute of Technology (KIT), Hermann-von-Helmholtz-Platz 1, 76344 Eggenstein-Leopoldshafen, Germany

<sup>3</sup> Institute of Mechanical Process Engineering and Mechanics, Karlsruhe Institute of Technology (KIT), Adenauerring 20b, 76131 Karlsruhe, Germany

<sup>4</sup> Engler Bunte Institut, Water Chemistry and Technology, Karlsruhe Institute of Technology (KIT), Adenauerring 20b, 76131 Karlsruhe, Germany

## S1. Liquid characteristics

Table S1 - Conductivity and pH of the liquids used for sample hydration (n = 2)

| Buffer   | Conductivity<br>/ mS/cm | pH<br>/ -       |
|----------|-------------------------|-----------------|
| System 1 | $< 1 \cdot 10^{-3}$     | $6.41 \pm 0.32$ |
| System 2 | $18.4 \pm 0.2$          | $6.45 \pm 0.47$ |
| System 3 | $14.9 \pm 0.2$          | $8.04 \pm 0.09$ |
| System 4 | $2.9 \pm 0.3$           | $8.00 \pm 0.02$ |

## S2. Auxetic hydrogel scaffold

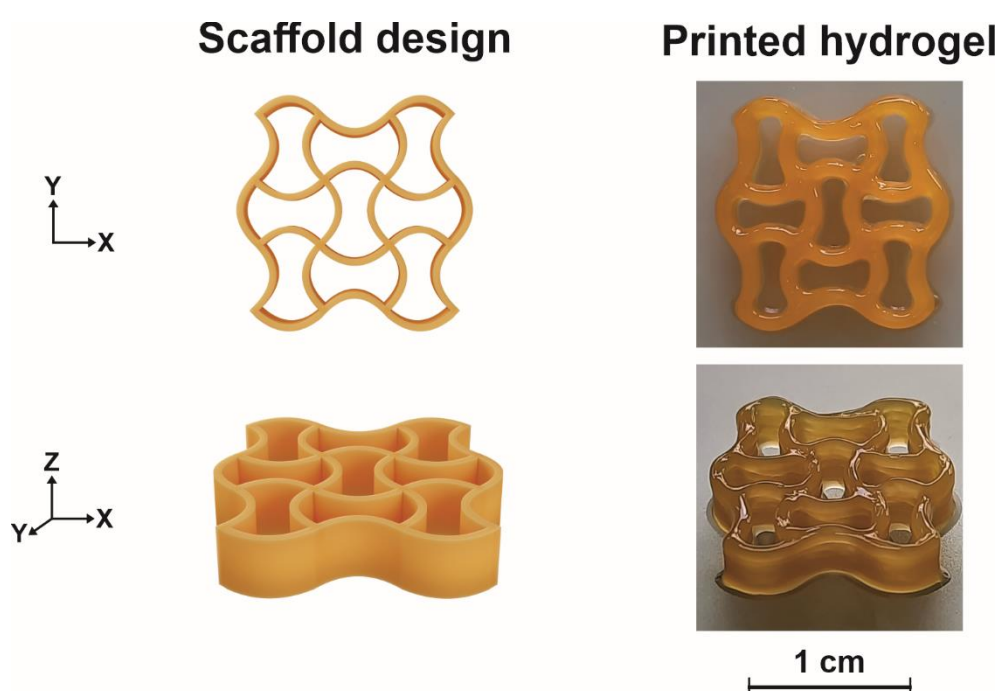

**Figure S1** – Design of the auxetic scaffold consisting of nine point-symmetrically arranged re-entrant honeycomb structures and one of the 3D printed auxetic protein-based hydrogels before drying

### S3. MRI parameters

**Table S2** – MRI device and experimental MRI parameters for the image acquisition of liquid systems 1 to 4

| <b>MRI parameter</b>                   | <b>Value</b>                      |
|----------------------------------------|-----------------------------------|
| MRI probe providing the sample chamber | MIC WB40 RES 200 1H 040/025 QTR   |
| Pulse sequence                         | Fast low-angle shot (FLASH) ortho |
| Field of view                          | 25 mm x 25 mm                     |
| Matrix                                 | 128 px x 128 px                   |
| Number of Slices                       | 10                                |
| Slice thickness                        | 0.6 mm                            |
| Slice distance                         | 0 mm                              |
| Repetition time                        | 0.2 s                             |
| Echo time                              | 1.88 ms                           |
| Number of averages                     | 4                                 |
| Acquisition time                       | 1 min 42 s                        |

### S4. MRI parameters for an optimized buffer-to-hydrogel contrast

**Table S3** – MRI device and experimental MRI parameters for the image generation for the optimized buffer-to-hydrogel contrast for liquid system 2.

| <b>MRI parameter</b>                   | <b>Value</b>                                         |
|----------------------------------------|------------------------------------------------------|
| MRI probe providing the sample chamber | MIC WB40 RES 200 1H 040/025 QTR                      |
| Pulse sequence                         | Rapid acquisition with relaxation enhancement (RARE) |
| Field of view                          | 25 mm x 25 mm                                        |
| Matrix                                 | 128 px x 128 px                                      |
| Number of Slices                       | 10                                                   |
| Slice thickness                        | 0.6 mm                                               |
| Slice distance                         | 0 mm                                                 |
| Repetition time                        | 2.13 s                                               |
| Echo time                              | 10 ms                                                |
| Number of averages                     | 4                                                    |
| RARE factor                            | 8                                                    |
| Acquisition time                       | 1 min 42 s                                           |
